# Supplementary material for: Cu-nanocluster-loaded N-doped porous graphitic carbon for electrochemical CO2 reduction towards syngas generation
Source: Royal Society of Chemistry journal article supplement (doi:10.1039/d3cc06173f), 2024-01-01
Supplement: d3cc06173f1.pdf [file d3cc06173f1.pdf]

## Electronic Supplementary Information

Cu nanoclusters loaded N-doped porous graphitic carbons for  
electrochemical CO<sub>2</sub> reduction towards syngas generation

Xuefu Hu,<sup>#a</sup> Haiyue Lu,<sup>#a</sup> Gen Li,<sup>a</sup> Baicheng Liao,<sup>a</sup> Xiuli Zhang,<sup>a</sup> and Liyong Chen,<sup>\*a,b</sup>

<sup>a</sup>Department of Pharmaceutical Engineering, Bengbu Medical College, Bengbu, 233030, China. E-mail: lychen@bbmc.edu.cn; huxuefu@bbmc.edu.cn.

<sup>b</sup>Anhui Province Key Laboratory of Translational Cancer Research, Bengbu Medical College, Bengbu, 233030, China.

## Experimental Section

### Materials and characterization methods

All chemical reagents were used as received. Nafion solution (5 wt% in mixture of water and 2-propanol) was purchased from Sigma Aldrich, and other chemicals and solvents, including zinc nitrate ( $\text{Zn}(\text{NO}_3)_2 \cdot 6\text{H}_2\text{O}$ ), copper(II) nitrate ( $\text{Cu}(\text{NO}_3)_2 \cdot 3\text{H}_2\text{O}$ ), 2-methylimidazole (Hmim), methanol (MeOH), ethanol (EtOH), and potassium bicarbonate ( $\text{KHCO}_3$ ), were purchased from Sinopharm Chemical Reagent Co., Ltd, China.

Scanning electron microscopy (SEM) and transmission electron microscopy (TEM) were performed for microstructural and morphological characterization on HITACHI UHR FE-SEM SU8220 and Talos F200S-G2, respectively. High-angle annular dark field-scanning transmission electron microscopy (HAADF-STEM) was carried out on Grand ARMF2. X-ray diffraction (XRD) was conducted in a Rigaku D/Max 2400 automatic powder X-ray diffractometer with Cu-K $\alpha$  radiation ( $\lambda = 1.5418 \text{ \AA}$ ). Linear-sweep voltammetry (LSV), cyclic voltammetry (CV), and electrochemical impedance spectroscopy (EIS) were carried out using a CHI760E electrochemical workstation with a typical three-electrode H-type cell.  $\text{N}_2$  sorption isotherm at 77 K and  $\text{CO}_2$  uptake at 293 K were obtained using a Micromeritics 3Flex surface characterization analyzer and Micromeritics TriStar II Plus automatic surface characterization analyzer, respectively. The content of Cu was evaluated by inductively coupled plasma atomic emission spectroscopy (ICP-AES) on Optima 2000DV. Gas chromatograph (GC7900 Techcomp) was performed on analyzing the gas products.  $^1\text{H}$  NMR analysis was conducted with a Bruker AC-400FT spectrometer (400 MHz) to analyze the liquid products.

### Materials synthesis

#### *Synthesis of Cu-doped ZIF-8*

*Solution A:* 2-methylimidazole (Hmim, 3.3g, 8mmol) in 60 mL of MeOH;

*Solution B:*  $\text{Zn}(\text{NO}_3)_2 \cdot 6\text{H}_2\text{O}$  (1.339 g, 0.9 mmol) and  $\text{Cu}(\text{NO}_3)_2 \cdot 3\text{H}_2\text{O}$  (0.121 g, 0.1 mmol) in 60 mL of MeOH.

Solution A was added dropwise to solution B with continuous stirring. The resulting mixture was stirred for an additional hour at room temperature, and the final product (Cu-doped ZIF-8) was collected by centrifugation, washed three times with ethanol, and dried overnight under ambient conditions.

*Synthesis of Cu nanoclusters loaded N-doped porous graphitic carbons\_10 (Cu/N-pg-C\_10)*

The as-made Cu-doped ZIF-8 (~100 mg) was loaded onto a porcelain boat and annealed at 1000 °C in a tubular furnace ramping at 2 °C/min in a 5% H<sub>2</sub>/Ar atmosphere and maintained at temperature for 2 h.

To prepare different Cu nanoclusters loaded N-doped porous graphitic carbon (Cu/N-pg-C\_5 and Cu/N-pg-C\_20), solution A can be adjusted by the choice of Zn(NO<sub>3</sub>)<sub>2</sub>·6H<sub>2</sub>O and Cu(NO<sub>3</sub>)<sub>2</sub>·3H<sub>2</sub>O with different amount in MeOH. For example, the molar ratio of Cu<sup>2+</sup> to total metal ions was 1:20 (5%) and 1:5 (20%), where the total mole of metal ions was 1 mmol.

*Synthesis of N-doped porous graphitic carbons (N-pg-C)*

The solution of Hmim (3.3g) in MeOH (60 mL) was added to the solution of Zn(NO<sub>3</sub>)<sub>2</sub>·6H<sub>2</sub>O (1.488 g) in MeOH (60 mL) with continuous stirring. The resulting mixture was stirred for an additional hour at room temperature, and the final product (ZIF-8) was collected by centrifugation, washed three times with ethanol, and dried overnight under ambient conditions.

ZIF-8 (~100 mg) was loaded onto a porcelain boat and annealed at 1000 °C in a tubular furnace ramping at 2 °C/min in a 5% H<sub>2</sub>/Ar atmosphere and maintained at temperature for 2 h.

**Electrochemical measurements**

The performance of the as-made electrocatalysts in CO<sub>2</sub>RR was assessed using a gas-tight H-type cell separated by an ion-exchange membrane (Nafion 117) at CHI 760E electrochemical workstation. The electrolyte was Ar- or CO<sub>2</sub>-saturated 0.5 M KHCO<sub>3</sub> solution. Ag/AgCl (saturated KCl solution), polished Pt wire, and self-supported electrocatalysts (1 × 1 cm<sup>2</sup>) were used as reference electrode, counter electrode, and working electrode, respectively. The measured potentials were converted to the

corresponding potentials of the reversible hydrogen electrode using the equation,  $E_{\text{RHE}} = E_{\text{Ag/AgCl}} + 0.197 \text{ V} + 0.0591 \times \text{pH}$ . Electrochemical impedance spectrums (EIS) were collected with frequencies from 0.1 Hz to 100 kHz. LSV tests were performed in Ar- or CO<sub>2</sub>-saturated 0.5 M KHCO<sub>3</sub> solution at a sweep rate of 5 mV s<sup>-1</sup> between -1.0 V and 0 V vs RHE. CV tests were carried out in CO<sub>2</sub>-saturated 0.5 M KHCO<sub>3</sub> solution at variable sweep rate from 10 to 50 mV s<sup>-1</sup> with an increment of 10 mV s<sup>-1</sup> between 0.2 V and 0.55 V vs RHE. The long-term stability of the electrocatalysts was estimated via the amperometric *i-t* tests.

Faradaic efficiency (FE) of the products was calculated from the equation,

$$FE(\%) = \frac{z \times n \times F}{Q} \times 100\%$$

, wherein  $z$  is the number of electrons for generation of product (1 mol),  $n$  is the molar amount of the product,  $F$  is the Faraday constant of 96485 C mol<sup>-1</sup>, and  $Q$  is the total charge in the electrochemical CO<sub>2</sub>RR.

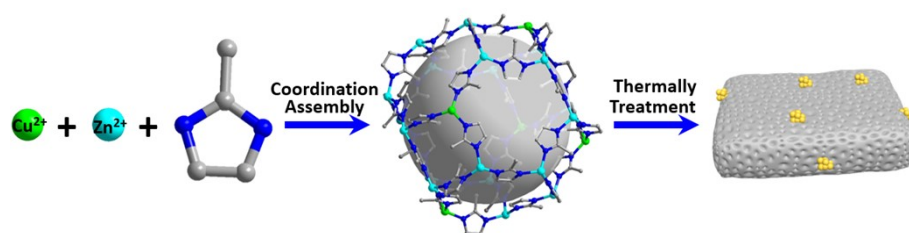

**Scheme S1.** Schematic illustration of the preparation of Cu nanoclusters loaded N-doped porous graphitic carbons by Cu-doped ZIF-8.

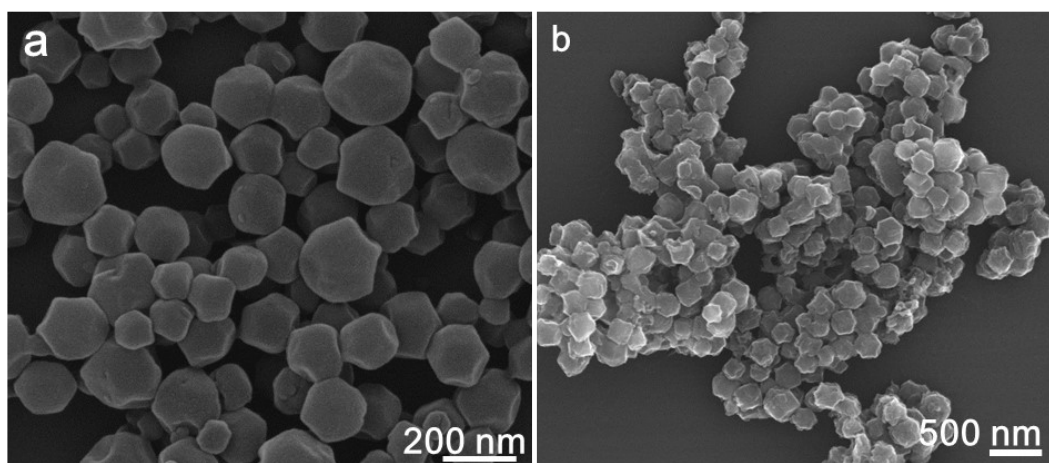

**Figure S1.** SEM images of (a) Cu-doped ZIF-8 and (b) pure ZIF-8.

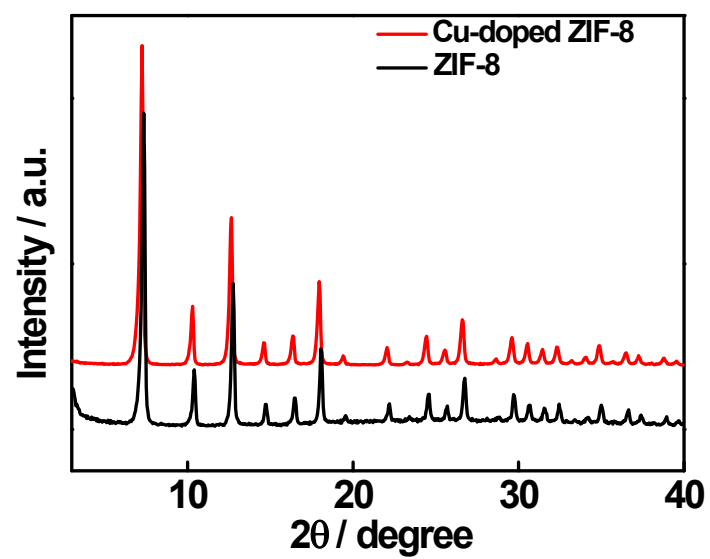

**Figure S2.** XRD patterns of (a) ZIF-8 and (b) Cu-doped ZIF-8.

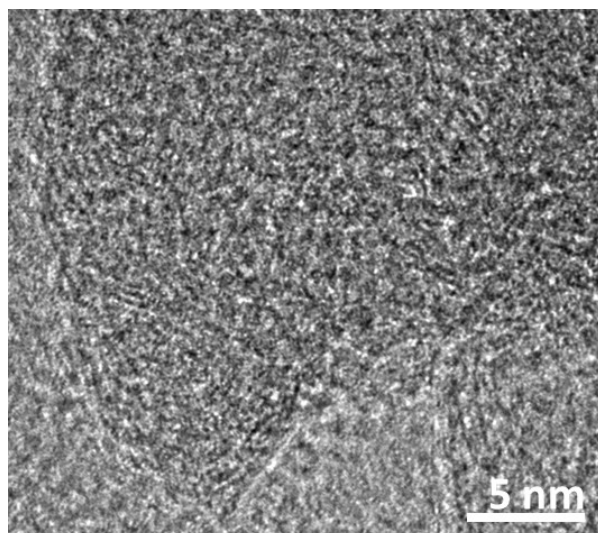

**Figure S3.** HRTEM image of Cu/N-*pg*-C<sub>10</sub> with graphitic structures.

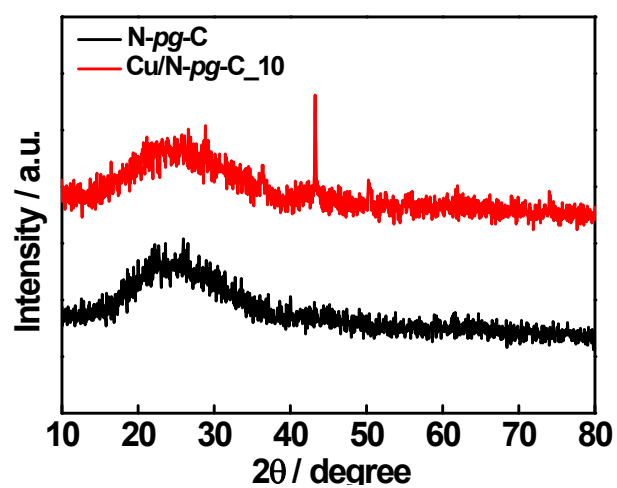

**Figure S4.** XRD patterns of N-pg-C and Cu/N-pg-C<sub>10</sub>.

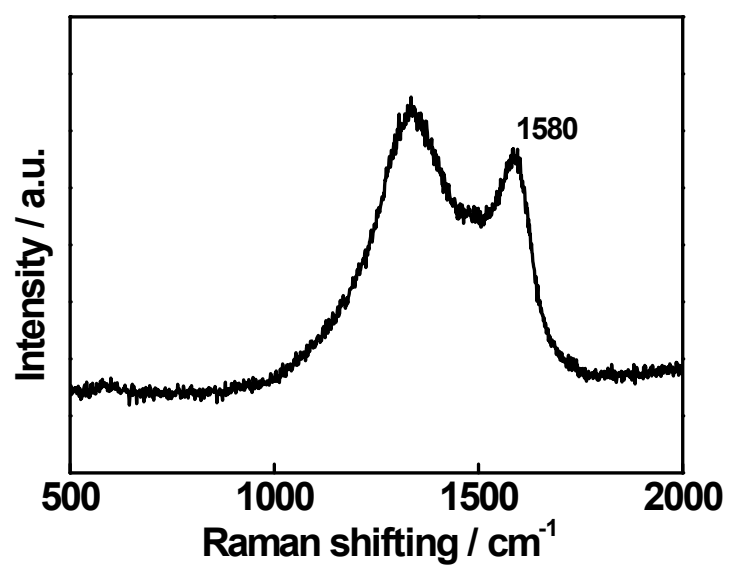

**Figure S5.** Raman spectrum of Cu/N-*pg*-C<sub>10</sub>.

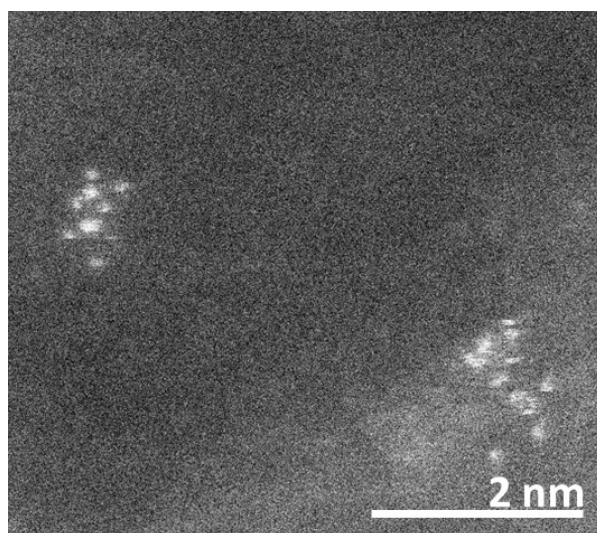

**Figure S6.** The high-magnified HAADF-STEM image of Cu/N-*pg*-C<sub>10</sub>.

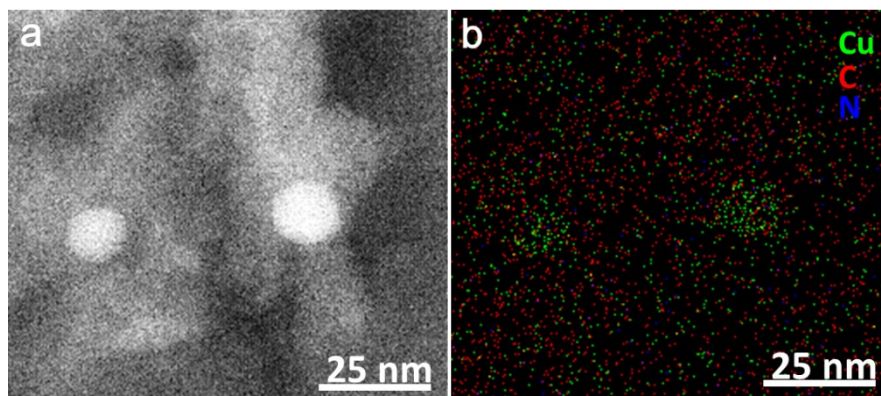

**Figure S7.** (a) HAADF image of (b) elemental mappings of Cu/N-*pg*-C<sub>10</sub>.

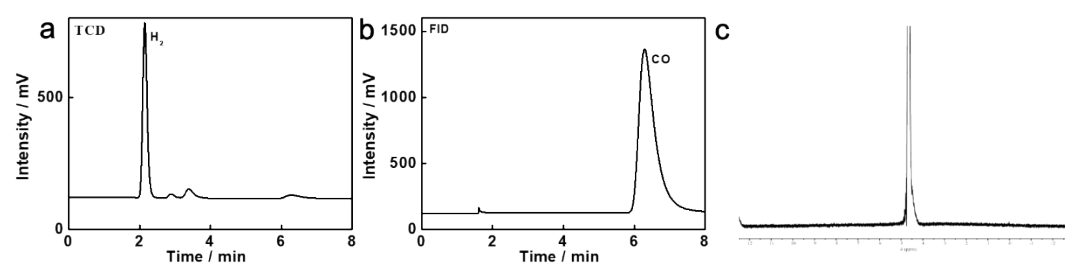

**Figure S8.** (a, b) GC of gas products and (c)  $^1H$ -NMR of liquid products over the Cu/N-*pg*-C\_10 electrocatalyst in  $CO_2$ -saturated  $KHCO_3$  at an applied potential of -0.5 V vs RHE for 1 h.

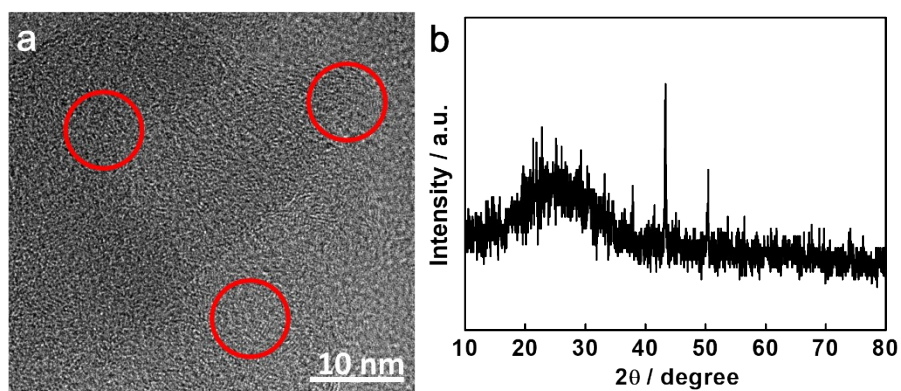

**Figure S9.** (a) HRTEM image and (b) XRD pattern of Cu/N-*pg*-C<sub>10</sub> after test for stability for 8 h.

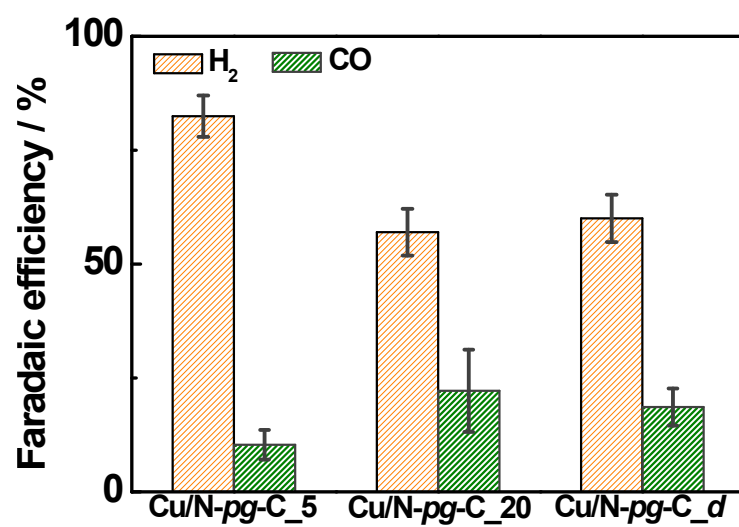

**Figure S10.** FE<sub>CO</sub> and FE<sub>H<sub>2</sub></sub> of various electrocatalysts in CO<sub>2</sub>-saturated 0.5 M KHCO<sub>3</sub> solution at -0.5 V vs RHE.

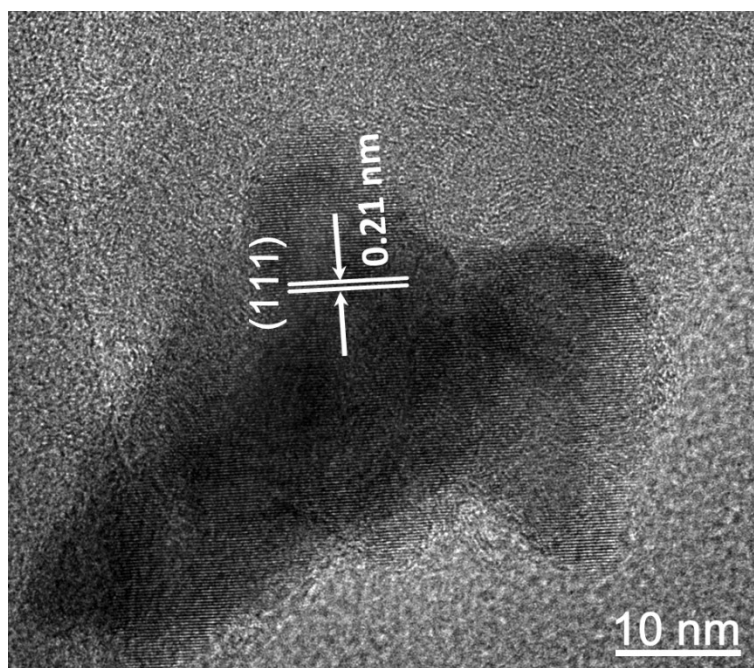

**Figure S11.** HRTEM image of Cu/N-pg-C<sub>20</sub>.

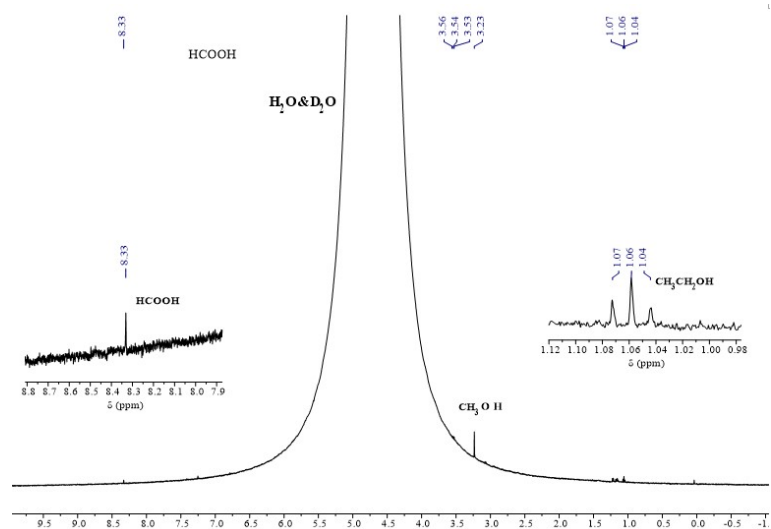

**Figure S12.**  $^1\text{H}$  NMR of liquid products over the Cu/N-*pg*-C<sub>20</sub> electrocatalyst in CO<sub>2</sub>-saturated KHCO<sub>3</sub> at an applied potential of -0.5 V vs RHE for 1 h

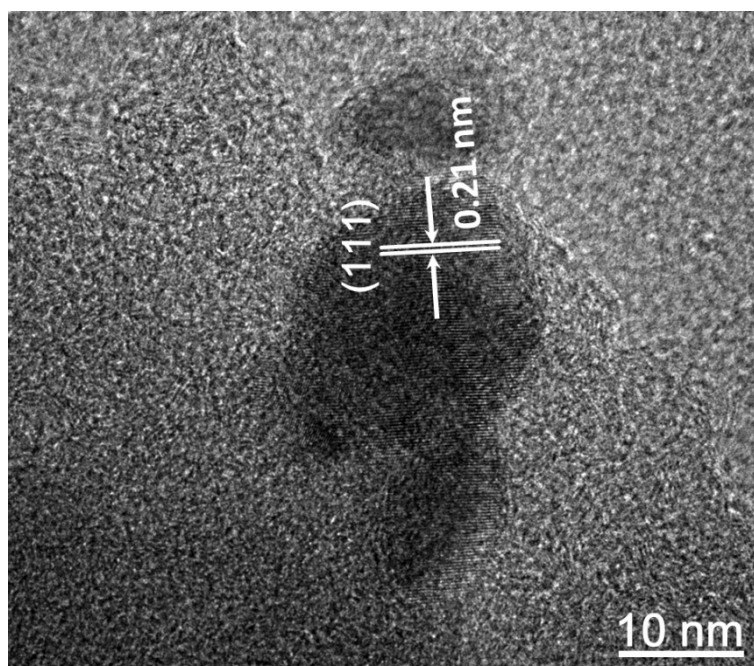

**Figure S13.** HRTEM image of Cu/N-*pg*-C<sub>*d*</sub>.

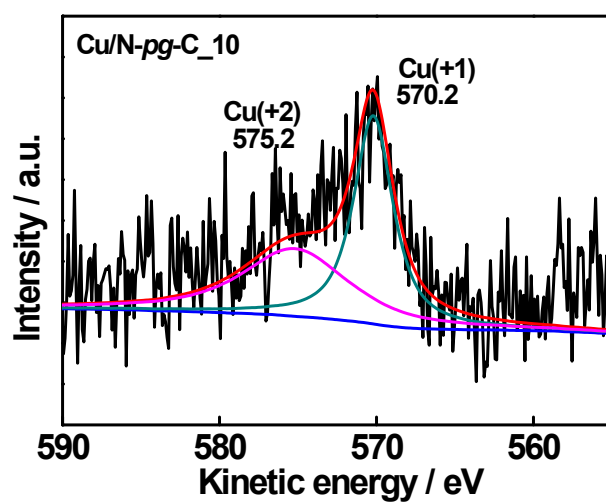

**Figure S14.** Cu LMM Auger spectrum of Cu/N-pg-C<sub>10</sub>.

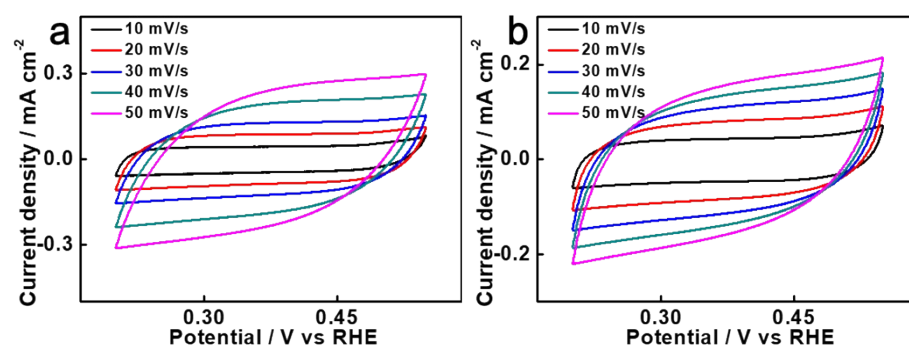

**Figure S15.** CV curves within a non-faradaic region at different scan rates: (a) Cu/N-*pg*-C<sub>10</sub> and (b) N-*pg*-C

**Table S1.** Summary of CO<sub>2</sub> electroreduction to syngas using different catalysts.

| Catalyst                             | Electrolyte                         | Potential (V vs RHE)                  |                                                | Ref       |
|--------------------------------------|-------------------------------------|---------------------------------------|------------------------------------------------|-----------|
|                                      |                                     | $j_{\text{CO}}$ (mA/cm <sup>2</sup> ) | $R_{\text{H}_2/\text{CO}}$ or $FE_{\text{CO}}$ |           |
| Pd/TaC                               | 0.5M KHCO <sub>3</sub> .            | 35.9@-0.7;<br>42.4@-0.8               | 1:0.6;<br>1:0.29                               | 1         |
| Au <sub>75</sub> Cu <sub>25</sub> /C | 0.1M KHCO <sub>3</sub>              | 28.5@-0.7                             | 92.6%                                          | 2         |
| Pd                                   | 0.1M KHCO <sub>3</sub>              | 2.52@-0.7;                            | 1:7.3;                                         | 3         |
| Icosahedra/C                         |                                     | 4.58@-0.8                             | 1:11.5                                         |           |
| oxide-derived Au                     | 0.5M NaHCO <sub>3</sub>             | 0.3–0.5@-0.25                         | ~1:1.85                                        | 4         |
| Cu <sub>3</sub> Se <sub>2</sub> -CF  | 0.1M KHCO <sub>3</sub>              | 11.9@-1.2                             | ~1:0.75                                        | 5         |
| Cu/In                                | 0.1M KHCO <sub>3</sub>              | ~6.5@-0.8;<br>~8.7@-1.1               | 1:9; 1:3                                       | 6         |
| PdCuCo                               | 0.5M [Bmim]PF <sub>6</sub> ,        | ~17@-1.16;                            | ~1:7;                                          | 7         |
|                                      | 0.5M H <sub>2</sub> SO <sub>4</sub> | ~27.7@-1.36                           | 0.6:1                                          |           |
| AuCu <sub>2</sub> /CNT               | 0.5M KHCO <sub>3</sub>              | 3.4@-0.4                              | 95.2%                                          | 8         |
| OD-Cu NAs                            | 0.1M KHCO <sub>3</sub>              | 1.64@-0.5                             | 1:1.7                                          | 9         |
| Cu/In <sub>2</sub> O <sub>3</sub>    | 0.1M KHCO <sub>3</sub>              | ~8.5@-0.9                             | 2:1                                            | 10        |
| NPs/C-H <sub>2</sub>                 |                                     |                                       |                                                |           |
| F-Cu <sub>2</sub> O/ZIF-8            | 0.1M KHCO <sub>3</sub>              | NA@-0.7;<br>NA@-0.8                   | ~2:1; 1:3                                      | 11        |
| Cu/N-pg-C <sub>10</sub>              | 0.5M KHCO <sub>3</sub>              | 12.1@-0.5;<br>7.57@-0.6               | ~1:3; 1:0.6                                    | this work |

**Reference**

- 1 J. Wang, S. Kattel, C. J. Hawxhurst, J. H. Lee, B. M. Tackett, K. Chang, N. Rui, C. J. Liu and J. G. Chen, *Angew. Chem. Int. Ed.*, 2019, **58**, 6271-6275.
- 2 F. Chang, C. Wang, X. Wu, Y. Liu, J. Wei, Z. Bai and L. Yang, *Materials*, 2022, **15**, 5064.
- 3 W. Zhu, S. Kattel, F. Jiao and J. G. Chen, *Adv. Energy Mater.*, 2019, **9**.
- 4 Y. Chen, C. W. Li and M. W. Kanan, *J. Am. Chem. Soc.*, 2012, **134**, 19969-19972.
- 5 Y. Hao, Y. Sun, H. Wang, J. Xue, J. Ren, A. A. S. Devi, M. Y. Maximov, F. Hu and S. Peng, *Electrochim. Acta*, 2023, **449**, 142213.
- 6 S. A. Mahyoub, F. A. Qaraah, S. Yan, A. Hezam, C. Chen, J. Zhong and Z. Cheng, *J. CO<sub>2</sub> Util.*, 2022, **61**, 102033.
- 7 S. Yang, P. Zhan, Z. Si, G. Li, M. Chu, C. Liu, L. Lu and P. Qin, *ChemNanoMat*, 2022, **9**, e202200470.
- 8 H. Chen, Z. Li, Z. Zhang, K. Jie, J. Li, H. Li, S. Mao, D. Wang, X. Lu and J. Fu, *Ind. Eng. Chem. Res.*, 2019, **58**, 15425-15431.
- 9 Y. Wang, C. Niu, Y. Zhu, D. He and W. Huang, *ACS Appl. Mater. Interfaces*, 2020, **3**, 9841-9847.
- 10 J. Shen, L. Wang, X. He, S. Wang, J. Chen, J. Wang and H. Jin, *ChemSusChem*, 2022, **15**, e202201350.
- 11 H. Luo, B. Li, J. G. Ma and P. Cheng, *Angew. Chem. Int. Ed.*, 2022, **61**, e202116736.
